# Supplementary material
Source: publisher figshare collection journal article supplement (https://frontiersin.figshare.com/ndownloader/files/12280304)
Supplement: Supplementary file [file 12280304]

**Table S4. Prediction accuracies of FHB traits when different proportions of FHB-resistant or FHB-susceptible lines were used as the testing population\***

| Type        | Trait | 10%              | 20%              | 30%              | 40%              | 50%              | 60%              | 70%              | 80%              | 90%              | 100%          |
|-------------|-------|------------------|------------------|------------------|------------------|------------------|------------------|------------------|------------------|------------------|---------------|
| Resistant   | INC   | 0.528<br>(0.009) | 0.539<br>(0.005) | 0.543<br>(0.004) | 0.532<br>(0.004) | 0.522<br>(0.003) | 0.512<br>(0.003) | 0.497<br>(0.003) | 0.49<br>(0.002)  | 0.478<br>(0.002) | 0.492<br>(0)  |
|             | SEV   | 0.403<br>(0.011) | 0.414<br>(0.006) | 0.42<br>(0.005)  | 0.411<br>(0.004) | 0.398<br>(0.003) | 0.386<br>(0.003) | 0.368<br>(0.002) | 0.346<br>(0.002) | 0.312<br>(0.002) | 0.293<br>(0)  |
|             | DON   | 0.249<br>(0.013) | 0.266<br>(0.008) | 0.266<br>(0.006) | 0.258<br>(0.004) | 0.251<br>(0.004) | 0.232<br>(0.004) | 0.214<br>(0.003) | 0.201<br>(0.003) | 0.187<br>(0.002) | 0.172<br>(0)  |
| Susceptible | INC   | 0.673<br>(0.007) | 0.678<br>(0.004) | 0.681<br>(0.003) | 0.667<br>(0.003) | 0.66<br>(0.002)  | 0.638<br>(0.002) | 0.616<br>(0.002) | 0.585<br>(0.002) | 0.548<br>(0.002) | 0.52 (0)      |
|             | SEV   | 0.373<br>(0.009) | 0.358<br>(0.006) | 0.339<br>(0.004) | 0.317<br>(0.004) | 0.296<br>(0.003) | 0.265<br>(0.003) | 0.23<br>(0.003)  | 0.179<br>(0.003) | 0.104<br>(0.003) | 0.023<br>(0)  |
|             | DON   | 0.522<br>(0.007) | 0.509<br>(0.005) | 0.493<br>(0.004) | 0.472<br>(0.003) | 0.441<br>(0.003) | 0.394<br>(0.004) | 0.331<br>(0.004) | 0.267<br>(0.004) | 0.143<br>(0.005) | -0.082<br>(0) |

\*The prediction accuracy is presented as the mean value, with the standard error in brackets. The 170 wheat lines were classified into FHB-resistant (69) and FHB-susceptible (101) subpopulations. The subpopulation was randomly sampled as the testing population with proportions of 10% to 100%. The three FHB traits studied were incidence (INC), severity (SEV), and deoxynivalenol concentration (DON). The prediction accuracy was calculated as the Pearson correlation between the observed and the predicted phenotypes.
